# Supplementary material
Source: publisher figshare collection journal article supplement (https://karger.figshare.com/ndownloader/files/15824477)
Supplement: Supplementary file 1 [file 15824477]

**Supplemental Material**

**Supplemental Figure Legends**

**Figure S1. ALTOLD study recruitment criteria and participant flow chart.**

**Figure S2. MDRD study recruitment criteria and participant flow chart.**

**Figure S3. AASK study recruitment criteria and participant flow chart.**

**Figure S4. CRIC study recruitment criteria and participant flow chart.**

**Sample SPSS Analysis Scripts**

**OLS Regression in MDRD**

REGRESSION

/MISSING LISTWISE

/STATISTICS COEFF OUTS CI(95) R ANOVA

/CRITERIA=PIN(.05) POUT(.10)

/NOORIGIN

/DEPENDENT LN_Fractional_change

/METHOD=ENTER Sq_percent_delta_GFR delta_sysBP interaction ACEiremoved ACEiadded DietGr_one DietGr_two.

Variables
LN_Fractional_change; *log transformed fractional change in permeability*

Sq_percent_delta_GFR; *square of the percentage change in GFR*

delta_sysBP; *change in systolic BP*

interaction; *product of change in systolic BP and (percentage reduction in GFR)2*

ACEiremoved; *ACEi or ARB use discontinued between baseline and final assessment*

ACEiadded; *ACEi or ARB use commenced between baseline and final assessment*

DietGr_one; *randomized to commence low protein diet after baseline assessment*

DietGr_two; *randomized to commence very low protein diet after baseline assessment*

**ALTOLD Repeated Measures Analysis**

GLM Ln_ACR_per_GFRT0 Ln_ACR_per_GFRT6 Ln_ACR_per_GFRT12 Ln_ACR_per_GFRT24

    Ln_ACR_per_GFRT36

  /WSFACTOR=Time 5 Polynomial

  /MEASURE=Ln_ACR_per_GFR

  /METHOD=SSTYPE(3)

  /PLOT=PROFILE(Time)

  /EMMEANS=TABLES(Time) COMPARE ADJ(BONFERRONI)

  /PRINT=DESCRIPTIVE ETASQ

  /CRITERIA=ALPHA(.05)

  /WSDESIGN=Time.

Variables

LN_ACR_per_GFRT0, …T6, …T12, …T24, …T36; *log-transformed (ACR/GFR) at time 0, 6, 12, 24, 36m*
